# Supplementary material for: Towards better understanding of the photophysics of platinum(ii) coordination compounds with anthracene- and pyrene-substituted 2,6-bis(thiazol-2-yl)pyridines
Source: Royal Society of Chemistry journal article supplement (doi:10.1039/d0dt02650f), 2020-01-01
Supplement: d0dt02650f1.pdf [file d0dt02650f1.pdf]

## Towards better understanding of photophysics of platinum(II) coordination compounds with anthracene and pyrene substituted 2,6-bis(thiazol-2-yl)pyridines

Anna Maria Maroń, Katarzyna Choroba, Tomasz Pedzinski, Barbara Machura

### Electronic Supplementary Information

#### ABSORPTION AND EMISSION SPECTRA IN DICHLOROMETHANE (RT)

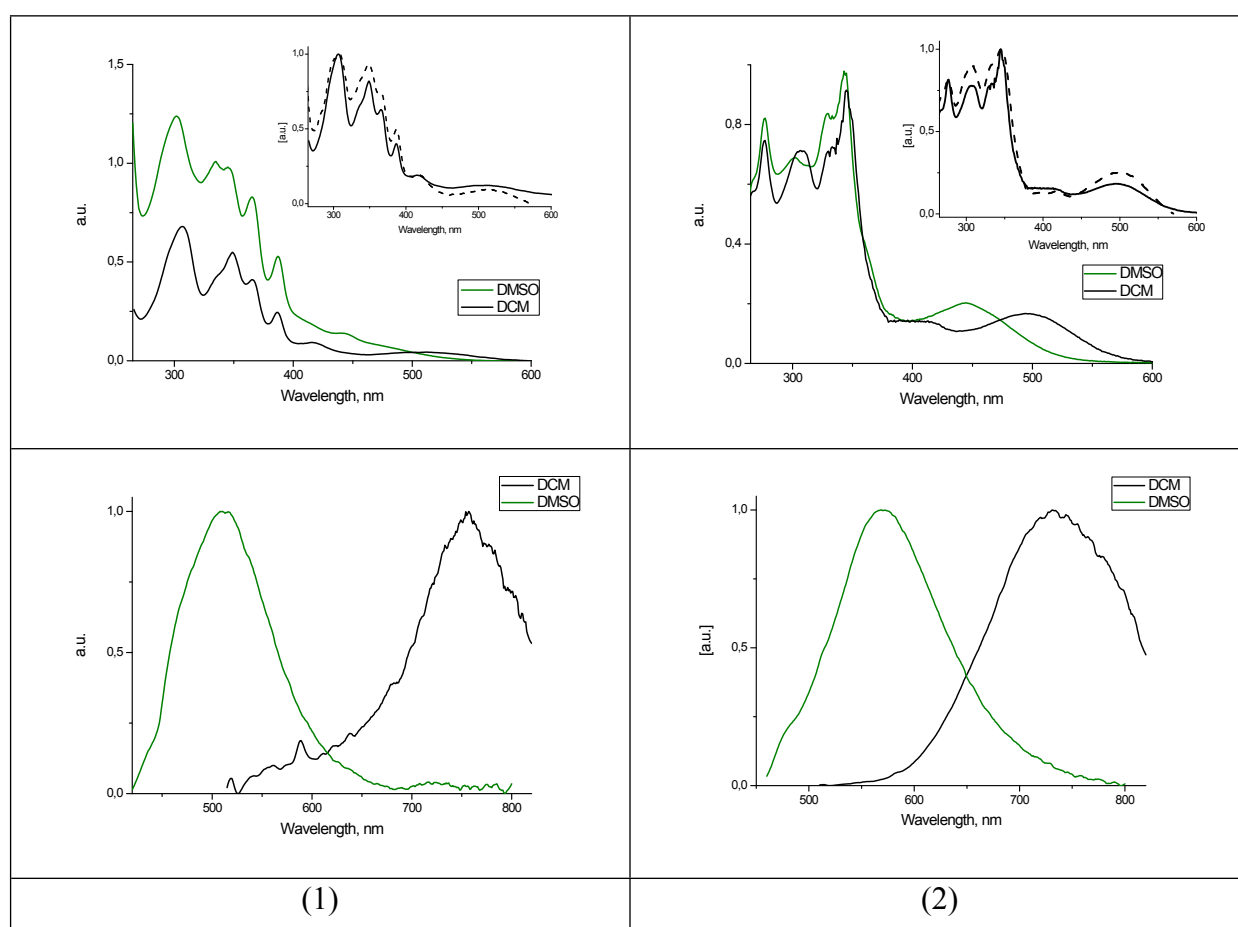

**Figure S1.** Absorption (upper) and emission (lower) spectra of (1) and (2) in CH<sub>2</sub>Cl<sub>2</sub> with comparison to DMSO solutions<sup>[1]</sup>. Insert plots: Comparison of normalized absorption (solid) and excitation (dash) spectra of (1) and (2) in CH<sub>2</sub>Cl<sub>2</sub>.

**Table S1.** Photoluminescence properties of (1) – (2) in CH<sub>2</sub>Cl<sub>2</sub>

|     | $\lambda_{\text{exc}}$ [nm]  | $\lambda_{\text{em}}$ [nm] | $\Delta E_{\text{exc-em}}$<br>[cm <sup>-1</sup> ] | $\tau$ [ $\mu\text{s}$ ] (% weight) | $\chi^2$ |
|-----|------------------------------|----------------------------|---------------------------------------------------|-------------------------------------|----------|
| (1) | 513, 417, 386, 366, 349, 308 | 755                        | 6248                                              | 10.53 (78.88%), 3.8 (21.12%)        | 1.009    |
| (2) | 500, 417, 346, 306, 277      | 733                        | 6357                                              | 11.3 (68.44%), 4.2 (31.56%)         | 0.982    |

**Scheme S1.** Schematic representation of possible deactivation pathways in bichromophoric transition metal compounds possessing <sup>3</sup>IL/<sup>3</sup>ILCT excited state as LEES proposed in Ref [2]: A) efficient <sup>1</sup>IL/<sup>1</sup>ILCT to <sup>1</sup>MLCT energy transfer and <sup>3</sup>IL/<sup>3</sup>ILCT and <sup>3</sup>MLCT excited states equilibrium; B) efficient and rapid internal conversion/intersystem crossing within the organic ligand subunit; C) inefficient singlet energy transfer to the transition metal chromophore and no <sup>3</sup>IL/<sup>3</sup>ILCT – <sup>3</sup>MLCT.

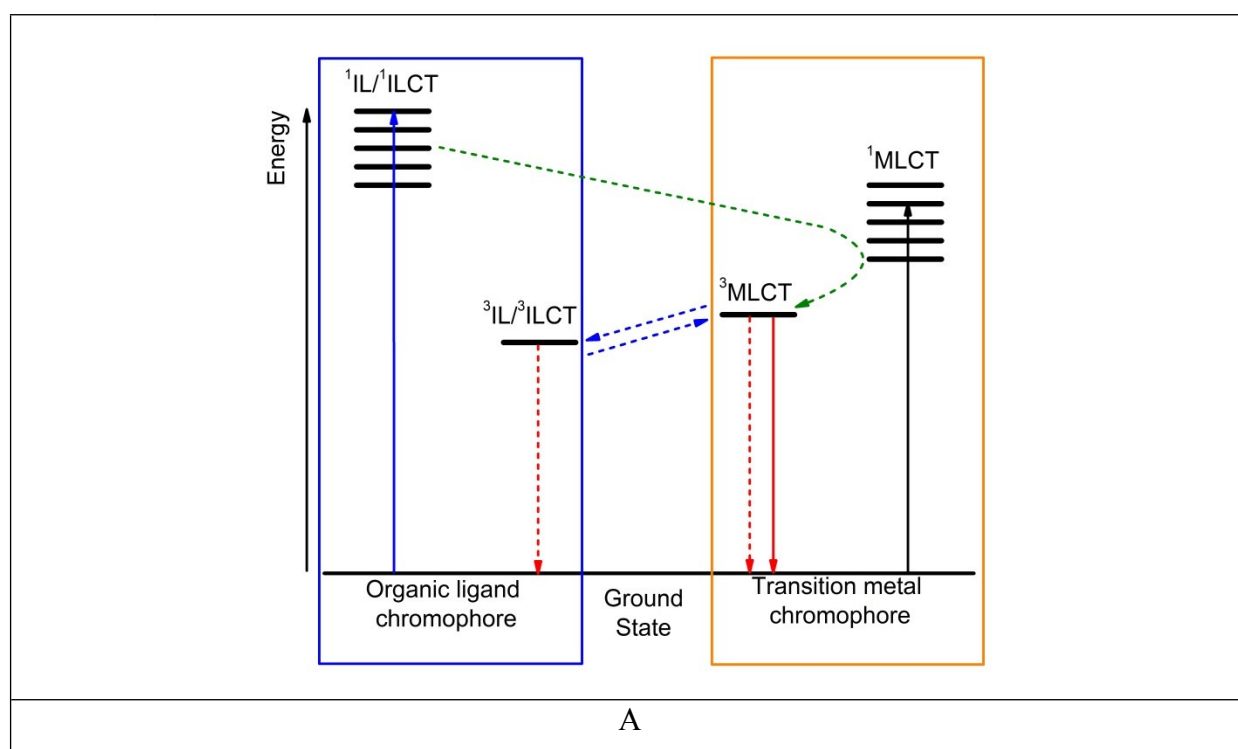

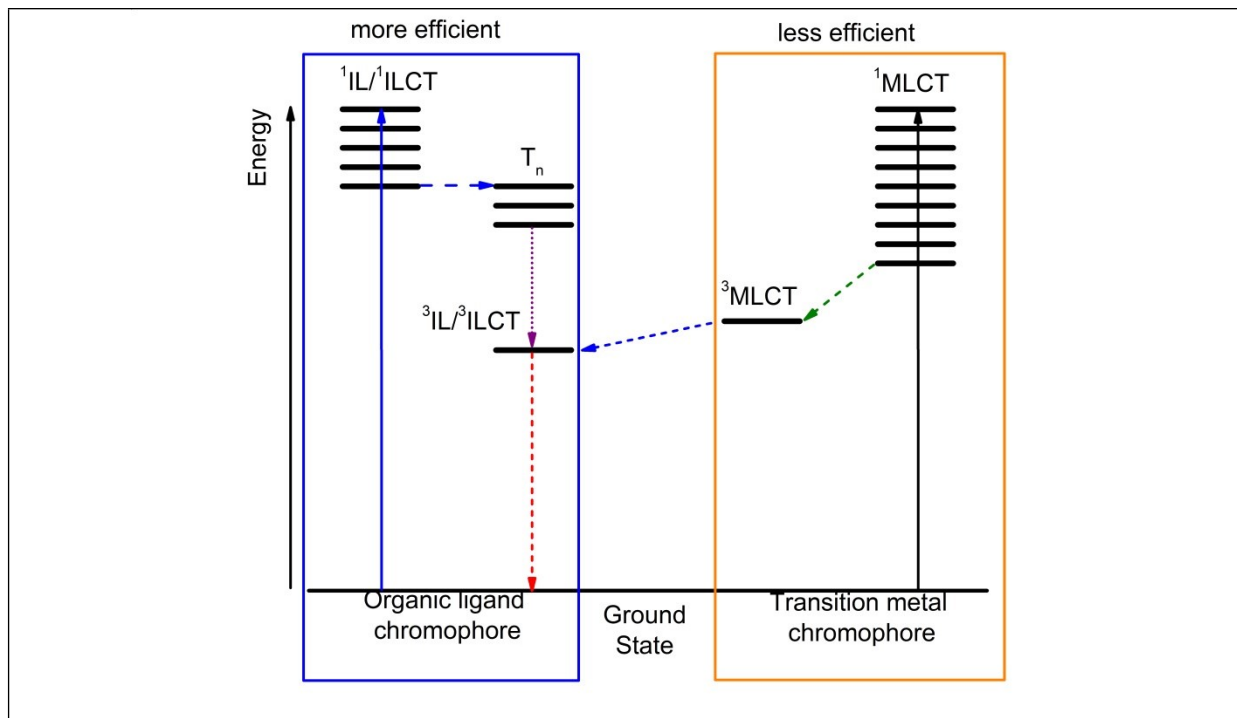

B

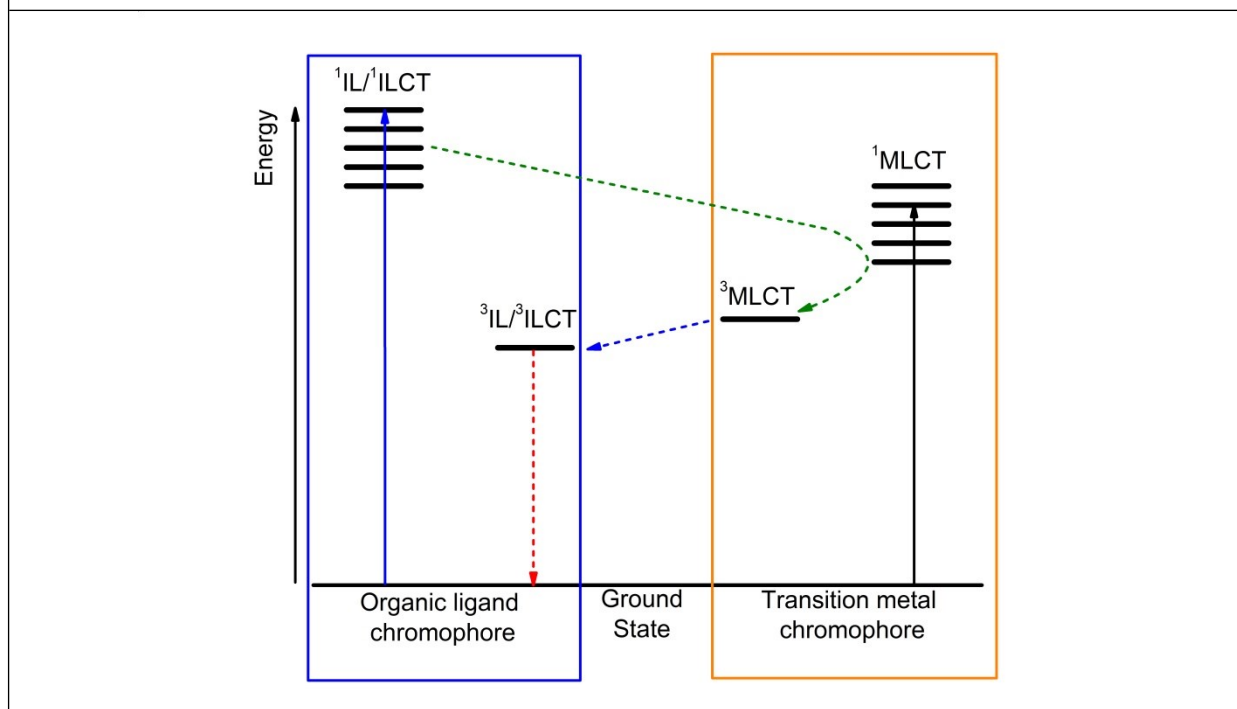

C

## SINGLET OXYGEN SENSITIZATION

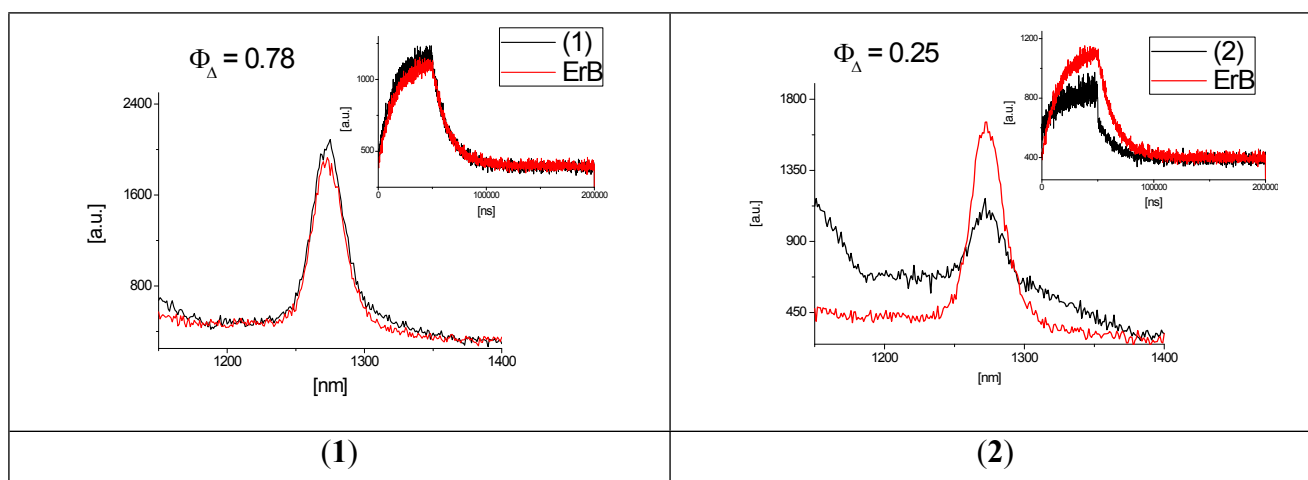

**Figure S2.** Emission peaks of singlet oxygen photogenerated by complexes (1)–(2) and reference erythrosine B (ErB) ( $\lambda_{PE} = 440$  nm); Insert plots: decay curves of singlet oxygen phosphorescence generated by (1)–(2) in relation to ErB in EtOH.

## EMISSION PROPERTIES AT 77K

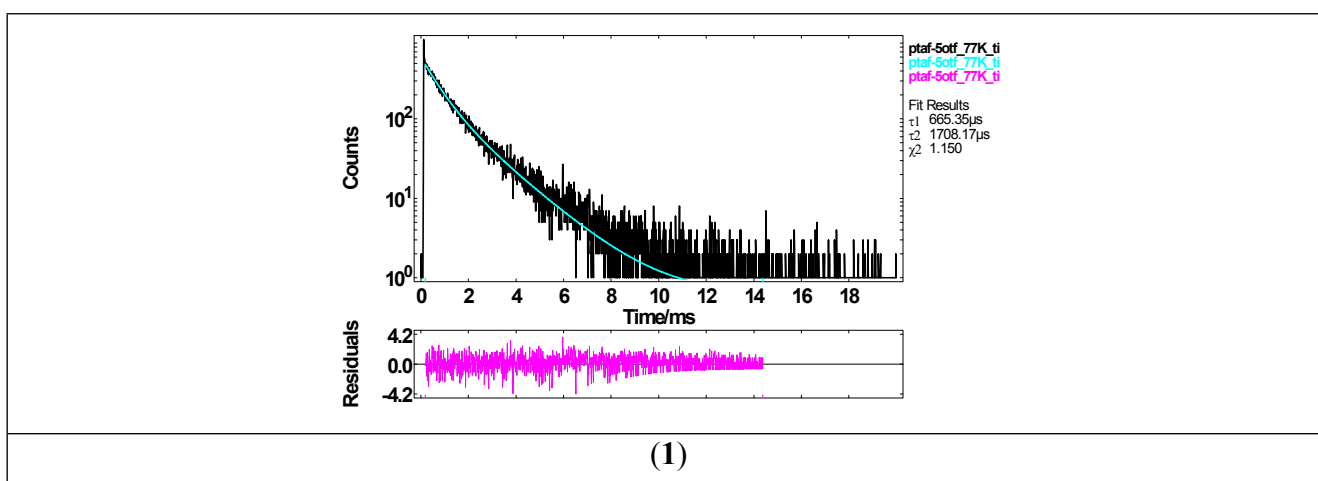

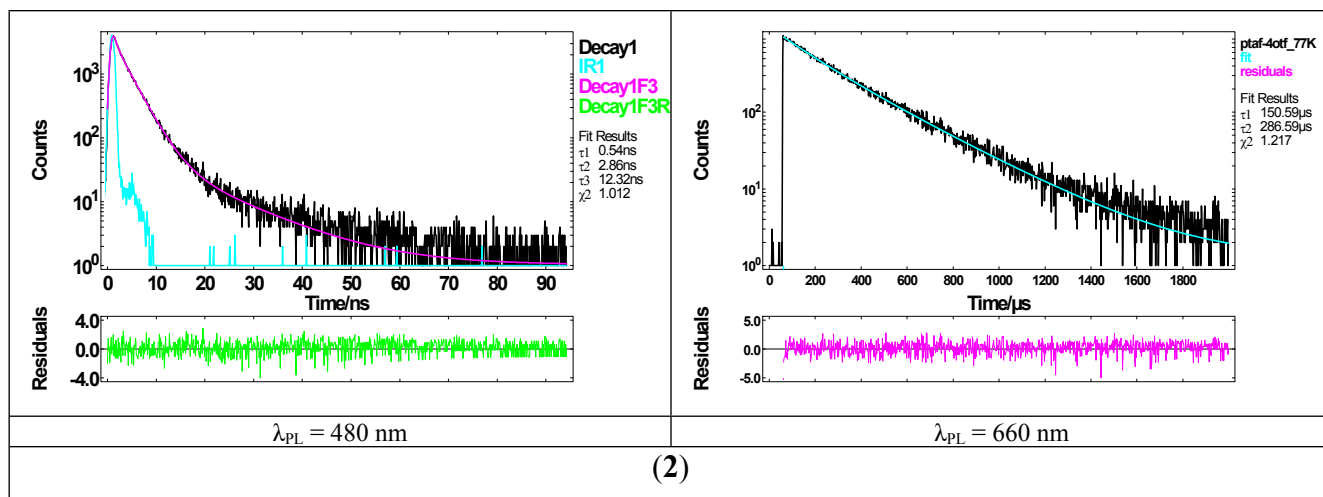

**Figure S3.** Decay curves of 77 K emission of complexes (1)–(2).

# NANOSECOND TRANSIENT ABSORPTION

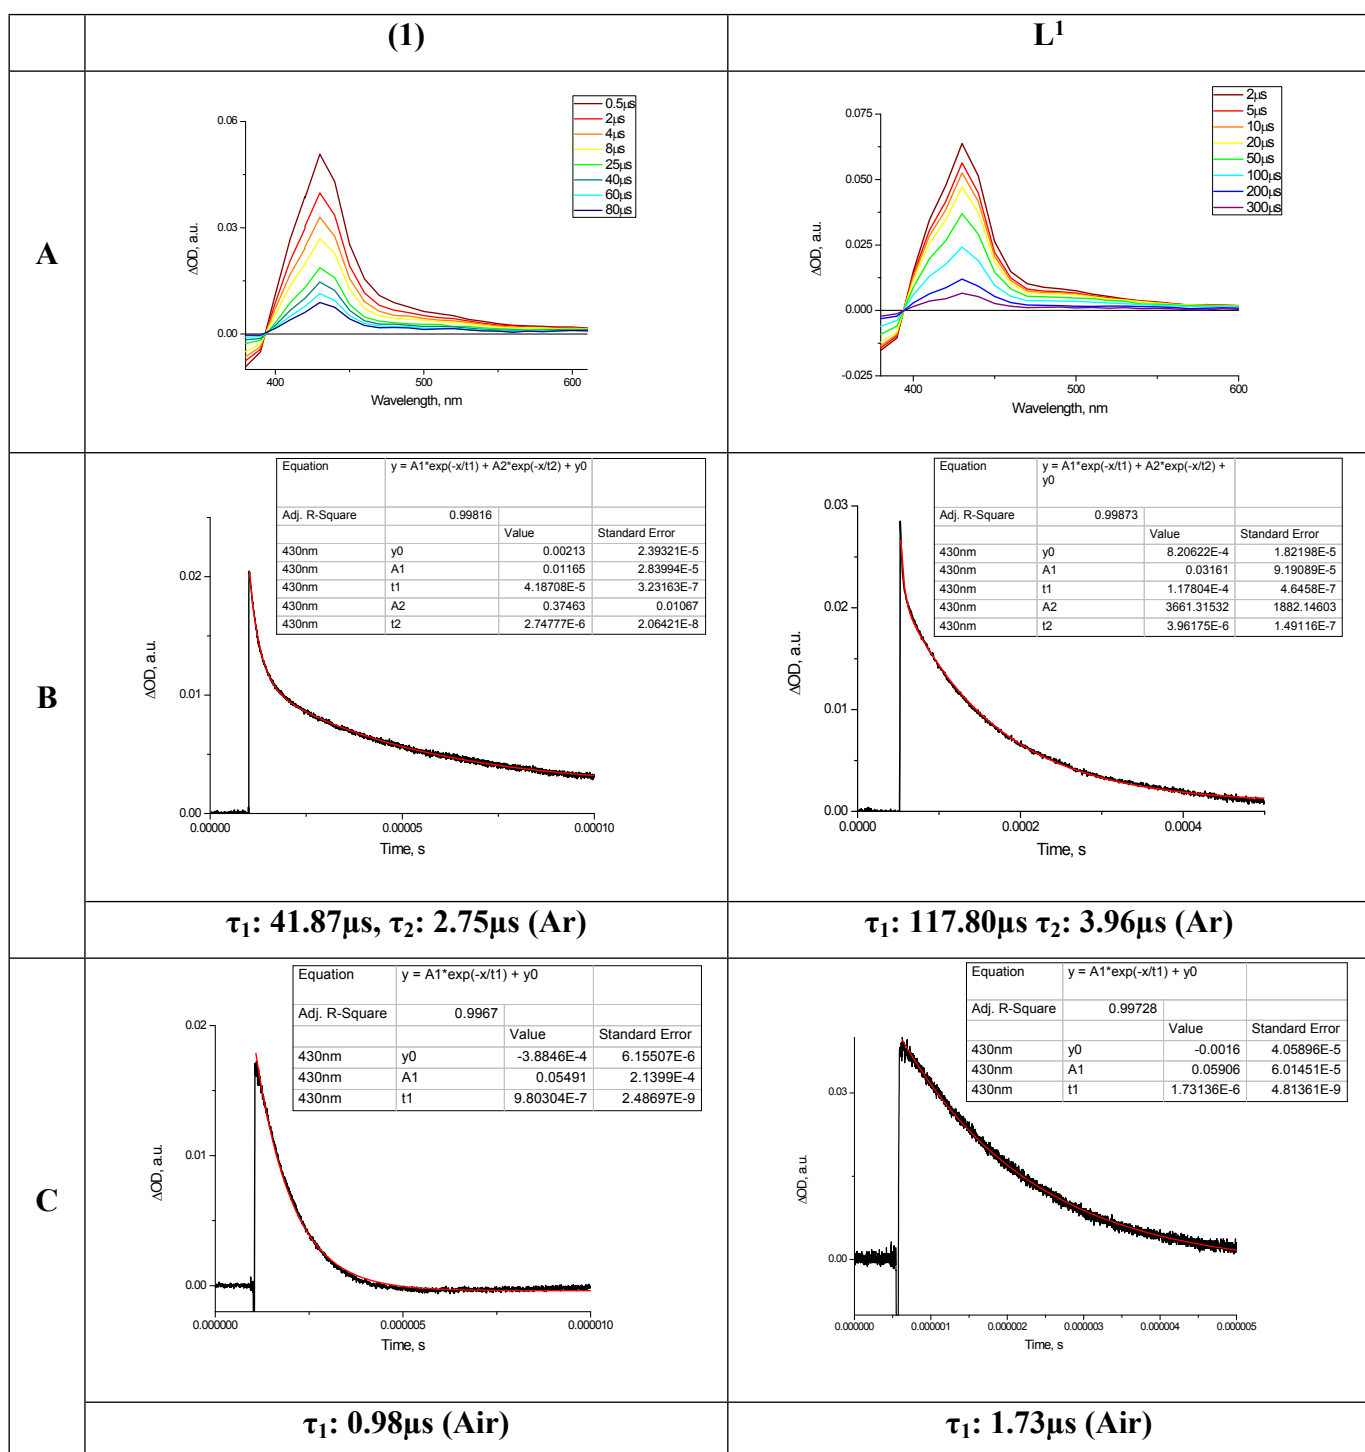

**Figure S4.** Nanosecond transient absorption spectra (A) and kinetic fit at  $\lambda = 430$  nm of argon bubbled (B) and air-equilibrated (C) DMSO solutions of (1) and L<sup>1</sup>

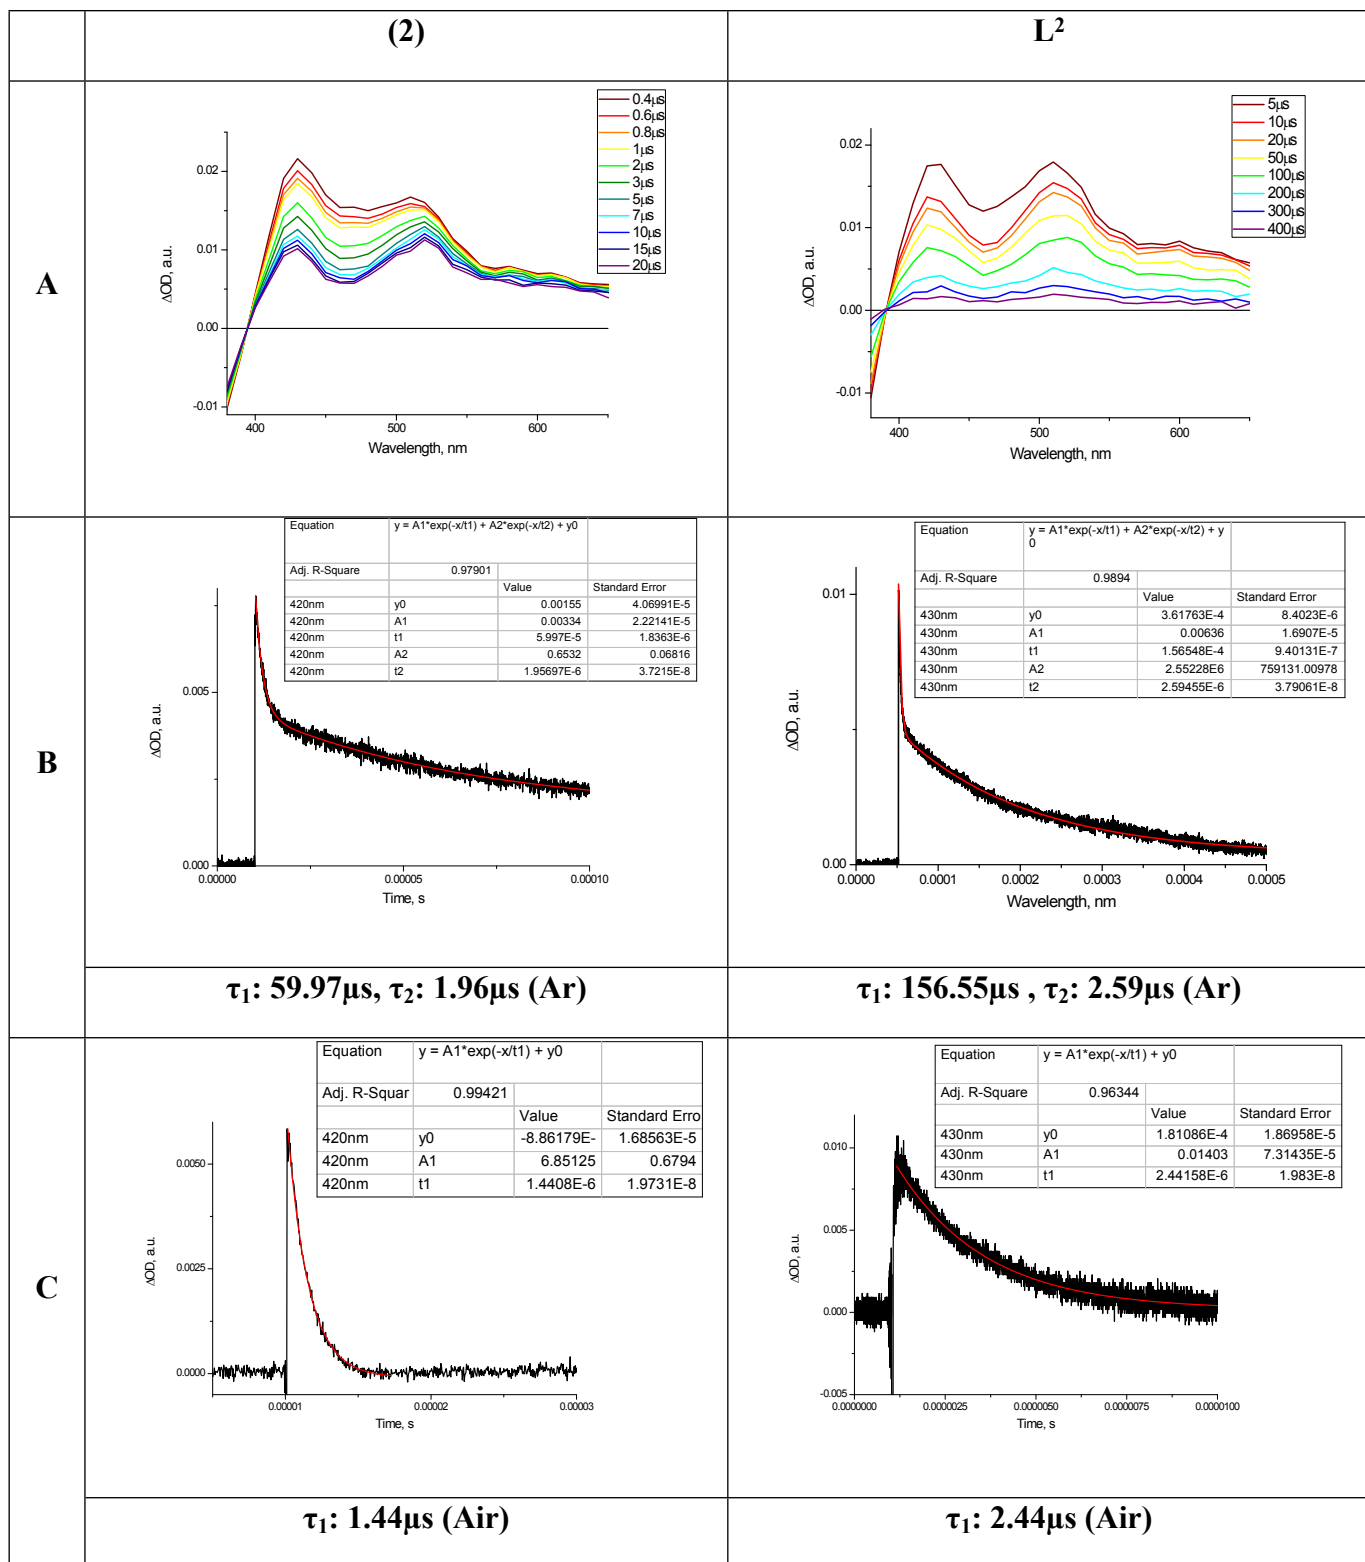

**Figure S5.** Nanosecond transient absorption spectra (A) and kinetic fit at  $\lambda = 420$  nm of argon bubbled (B) and air-equilibrated (C) DMSO solutions of (2) and L<sup>2</sup>

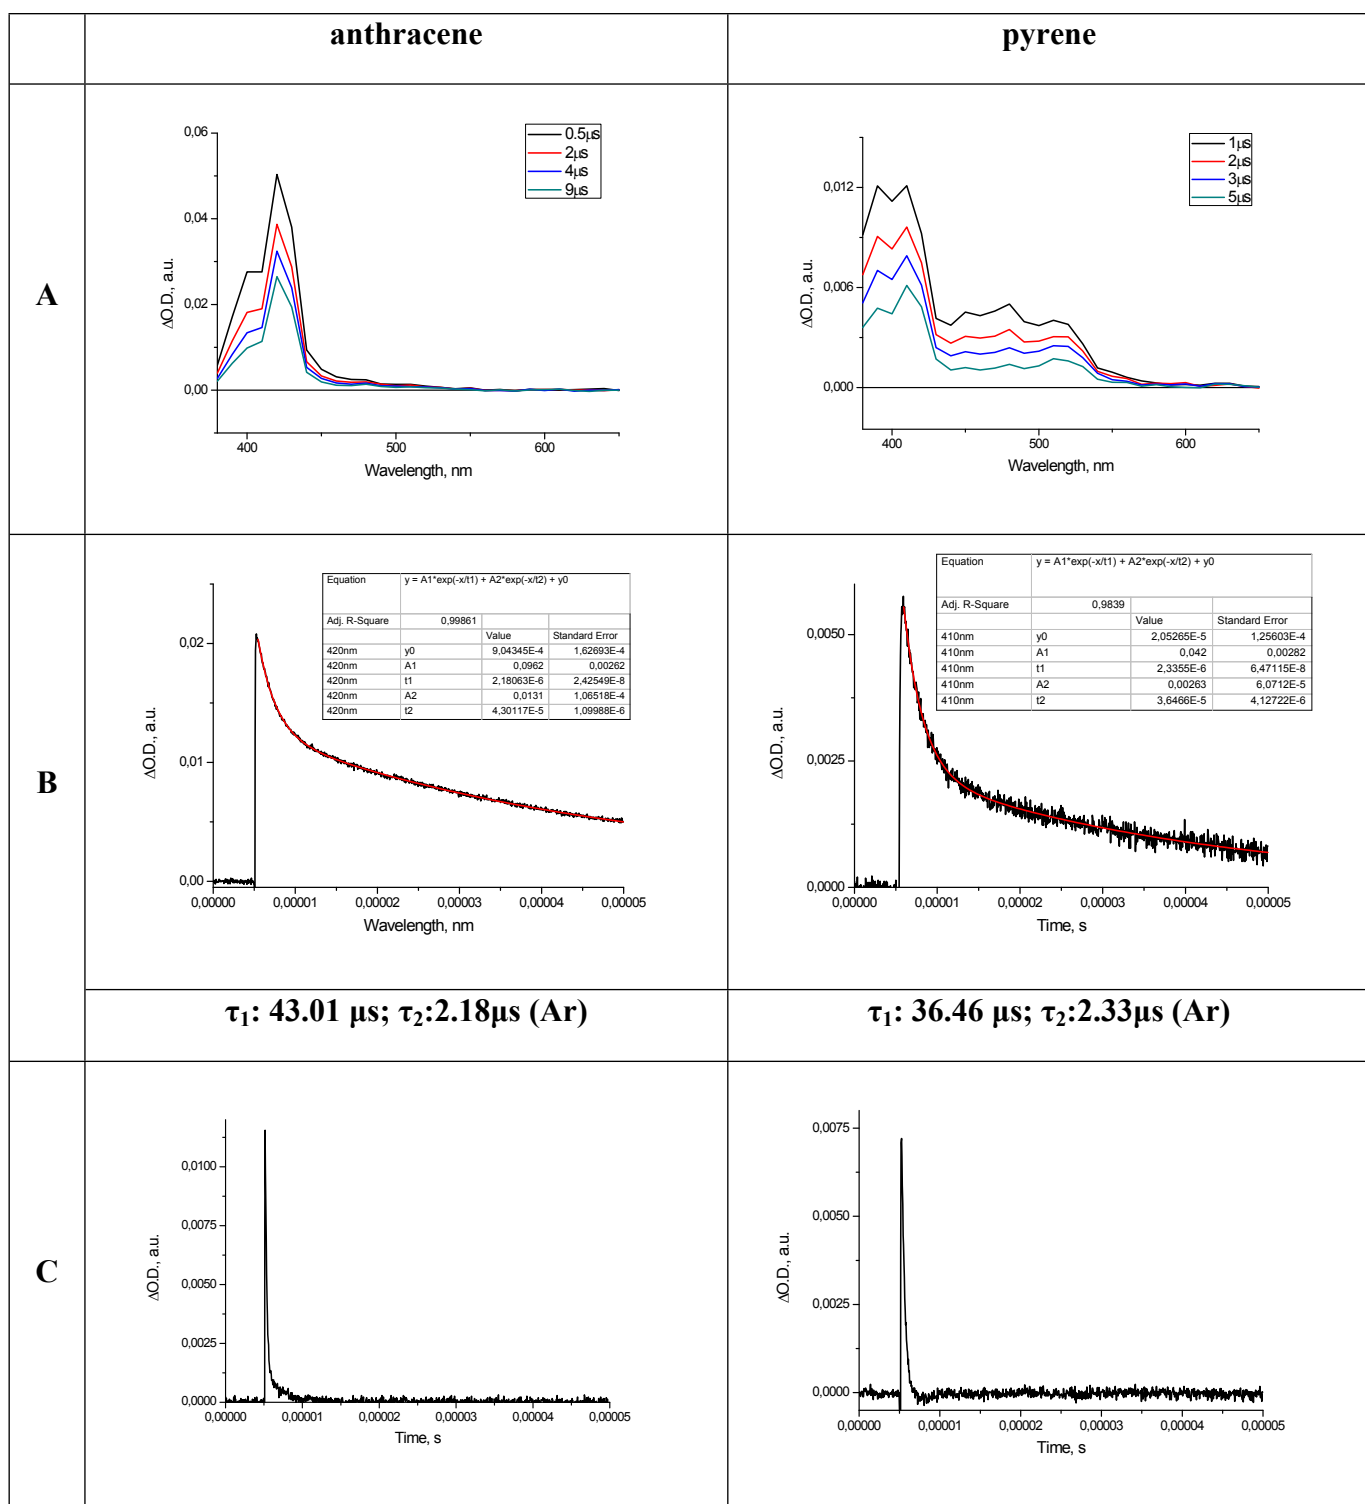

**Figure S6.** Nanosecond transient absorption spectra (A) and kinetic traces at  $\lambda = 420$  nm (anthracene)/410nm (pyrene) of argon bubbled (B) and air-equilibrated (C) solutions of anthracene and pyrene.



## FEMTOSECOND TRANSIENT ABSORPTION

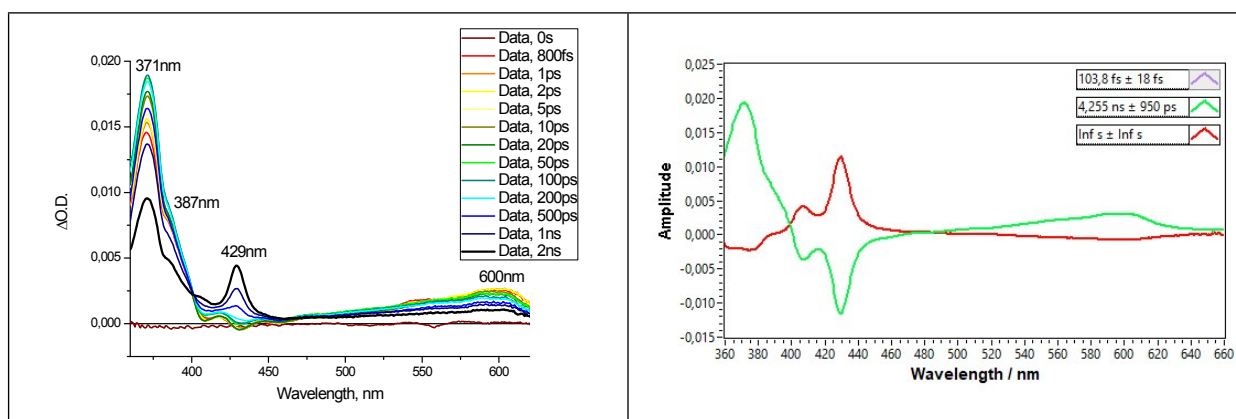

**Figure S7.** Femtosecond transient absorption spectra and decay associated spectrum of anthracene.

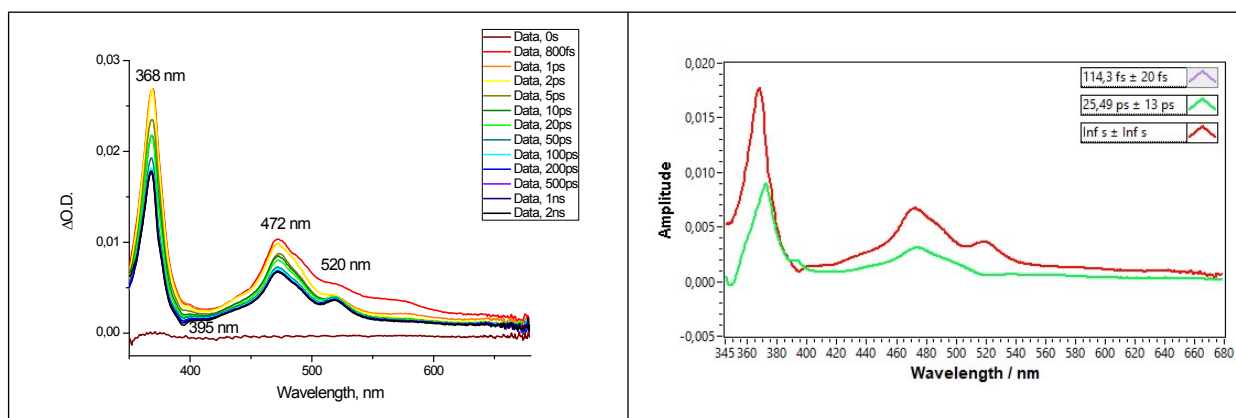

**Figure S8.** Femtosecond transient absorption spectra and decay associated spectrum of pyrene.

## ANALYTICAL DATA FOR L<sup>1</sup>, L<sup>2</sup>, (1) and (2)

**L<sup>1</sup>: C<sub>25</sub>H<sub>15</sub>N<sub>3</sub>S<sub>2</sub> (421.54 g mol<sup>-1</sup>):** calcd C 71.25%, H 3.58%, N 9.97%; found C 71.54%, H 3.66%, N 9.79%. **<sup>1</sup>H NMR (400 MHz, CDCl<sub>3</sub>)**  $\delta$  8.57 (s, 1H), 8.35 (s, 2H), 8.08 (d,  $J = 8.5$  Hz, 2H), 7.92 (d,  $J = 3.0$  Hz, 2H), 7.69 (d,  $J = 8.8$  Hz, 2H), 7.53 (d,  $J = 3.0$  Hz, 2H), 7.51 – 7.46 (m, 2H), 7.42 – 7.36 (m, 2H). **<sup>13</sup>C NMR (100 MHz, CDCl<sub>3</sub>)**  $\delta$  168.74, 151.57, 150.40, 144.44, 133.00, 131.36, 129.53, 128.71, 128.08, 126.38, 126.03, 125.48, 123.08, 122.13.

**L<sup>2</sup>: C<sub>27</sub>H<sub>17</sub>N<sub>3</sub>S<sub>2</sub> (447.44 g mol<sup>-1</sup>):** calcd C 72.47%; H 3.83%; N 14.30%; found: C 72.13%; H 3.69%; N 14.47%. **<sup>1</sup>H NMR (400 MHz, CDCl<sub>3</sub>)**  $\delta$  8.54 (s, 2H), 8.30 – 8.20 (m, 4H), 8.16 – 8.03 (m, 5H), 7.97 (d,  $J = 3.1$  Hz, 2H), 7.54 (d,  $J = 3.1$  Hz, 2H). **<sup>13</sup>C NMR (100 MHz, CDCl<sub>3</sub>)**  $\delta$  168.88, 152.02, 151.33, 144.38, 133.88, 131.85, 131.52, 130.99, 128.77, 128.39, 128.37, 127.49, 127.26, 126.42, 125.82, 125.55, 125.06, 124.97, 124.86, 124.27, 122.13, 122.01.

**(1): C<sub>25</sub>H<sub>15</sub>S<sub>2</sub>N<sub>3</sub>ClPt, CF<sub>3</sub>SO<sub>3</sub>:** calcd C 38.98%, H 1.89%, N 5.25%; found: C 38.73%; H 1.884%; N 5.537%. **IR (KBr; cm<sup>-1</sup>):** 3437 $\nu$ <sub>(OH)</sub>, 3124, 3066 $\nu$ <sub>(ArH)</sub>; 1607  $\nu$ <sub>(C=N, C=C)</sub>; 1451  $\delta$ <sub>(C-CH out of the plane)</sub>; 1255  $\nu$ <sub>a</sub>(SO<sub>3</sub>), 1153 $\nu$ <sub>(C-N)</sub>; 1092  $\delta$ <sub>(C-CH in the plane)</sub>; 1030  $\nu$ <sub>s</sub>(SO<sub>3</sub>); 895  $\delta$ <sub>(C-C out of the plane)</sub>, 732  $\delta$ <sub>(C-C out of the plane)</sub>; 634  $\delta$ <sub>(SO<sub>3</sub>)</sub>. **<sup>1</sup>H NMR (400 MHz, ppm)**  $\delta$  8.90 (s, 1H, H<sup>C8</sup>), 8.88 (s, 2H, H<sup>B2</sup>), 8.48 (d,  $J = 3.4$  Hz, 2H, H<sup>A1</sup>), 8.27 (d,  $J = 8.4$  Hz, 2H, H<sup>C3</sup>), 8.03 (d,  $J = 3.4$  Hz, 2H, H<sup>A2</sup>), 7.87 (d,  $J = 8.7$  Hz, 2H, H<sup>C6</sup>), 7.66 – 7.55 (m, 4H, H<sup>C4, C5</sup>). **<sup>13</sup>C NMR (100 MHz, ppm)**  $\delta$  169.71 (C<sup>A3</sup>), 153.87 (C<sup>C1</sup>), 151.07 (C<sup>B1</sup>), 140.88 (C<sup>A2</sup>), 130.98 (C<sup>C2</sup>), 130.65 (C<sup>C7</sup>), 129.00 (C<sup>A1</sup>), 128.79 (C<sup>C3</sup>), 128.67 (C<sup>C8</sup>), 127.05 (C<sup>C4, C5</sup>), 126.09 (C<sup>C4, C5</sup>), 125.82 (C<sup>B2</sup>), 125.60 (C<sup>C6</sup>).

**(2): C<sub>27</sub>H<sub>15</sub>S<sub>2</sub>N<sub>3</sub>ClPt, CF<sub>3</sub>SO<sub>3</sub>:** calcd C 40.76%, H 1.83%, N 5.09%; found: C 40.54%, H 1.904%, N 4.943%. **IR (KBr; cm<sup>-1</sup>):** 3454  $\nu$ <sub>(OH)</sub>, 3067, 2922  $\nu$ <sub>(ArH)</sub>; 1606  $\nu$ <sub>(C=N, C=C)</sub>; 1483, 1453  $\delta$ <sub>(C-CH out of the plane)</sub>; 1253, 1152 $\nu$ <sub>(C-N)</sub>; 1079  $\delta$ <sub>(C-CH in the plane)</sub>; 1028  $\nu$ <sub>s</sub>(SO<sub>3</sub>); 849  $\delta$ <sub>(C-C out of the plane)</sub>, 721  $\delta$ <sub>(C-C in the plane)</sub>; 636  $\delta$ <sub>(SO<sub>3</sub>)</sub>. **<sup>1</sup>H NMR (400 MHz, ppm)**  $\delta$  8.88 (s, 2H, H<sup>B2</sup>), 8.48 – 8.45 (m, 3H, H<sup>A1+C13</sup>), 8.41 (d,  $J = 7.6$  Hz, 1H, H<sup>C8</sup>), 8.34 – 8.30 (m, 4H, H<sup>C10+C6+C3+C2</sup>), 8.27 – 8.23 (m, 2H, H<sup>C12+C5</sup>), 8.14 (t,  $J = 7.6$  Hz, 1H, H<sup>C9</sup>), 7.93 (d,  $J = 3.4$  Hz, 2H, H<sup>A2</sup>). **<sup>13</sup>C NMR (100 MHz, ppm)**  $\delta$  169.01 (C<sup>A3</sup>), 154.57 (C<sup>C1</sup>), 150.10 (C<sup>B1</sup>), 140.70 (C<sup>A2</sup>), 131.96 (C<sup>C4</sup>), 131.50 (C<sup>C7</sup>), 130.79 (C<sup>B3</sup>), 130.15 (C<sup>C2</sup>), 129.16 (C<sup>A1</sup>), 129.08 (C<sup>C6</sup>), 128.86 (C<sup>C11</sup>), 127.51 (C<sup>C9</sup>), 127.46 (C<sup>C12</sup>), 127.15 (C<sup>C5</sup>), 126.89 (C<sup>C14</sup>), 126.52 (C<sup>C8</sup>), 125.79 (C<sup>C13</sup>), 125.05 (C<sup>C10</sup>), 124.78 (C<sup>B2</sup>), 123.83 (C<sup>C3</sup>), 123.62 (C<sup>C15, C16</sup>), 123.51 (C<sup>C15, C16</sup>).

## STABILITY STUDIES IN DMSO SOLUTIONS

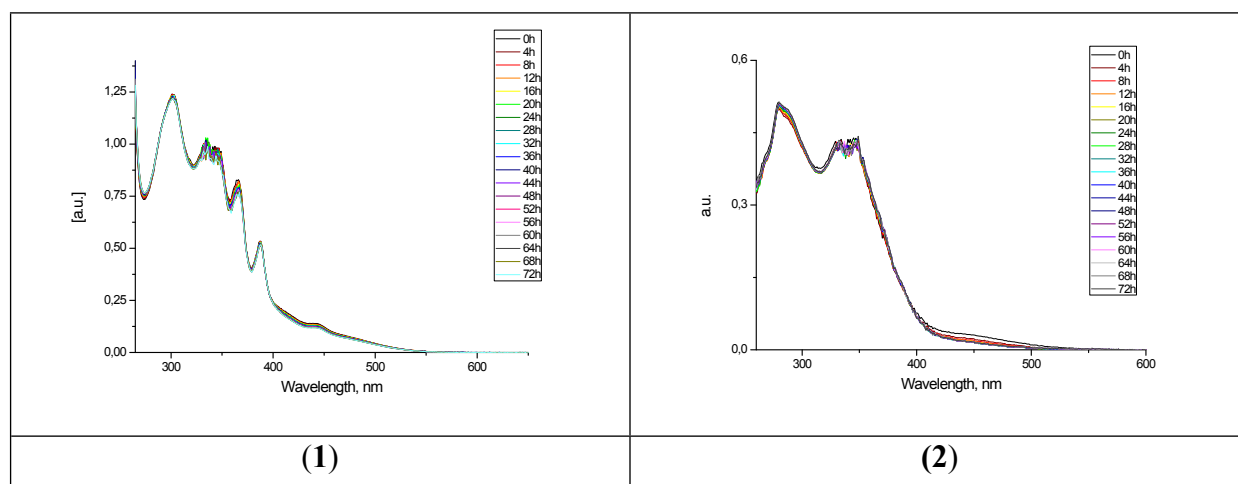

**Figure S9.** Stability studies in DMSO solution of compounds (1) and (2).

## REFERENCES

- [1] K. Choroba, B. Machura, L. R Raposo, J. G. Małeckci, S. Kula, M. Pająk, K. Erfurt, A. Maroń, A. R Fernandes, *Dalton Transactions*, 2019, **48**, 13081–13093
- [2] J. E. Yarnell, K. A. Wells, J. R. Palmer, J. M. Breaux, F. N. Castellano, *J. Phys. Chem. B* 2019, **123**, 7611–7627
